# Supplementary material for: Inactivation of an urban wastewater indigenous Escherichia coli strain by cerium doped zinc oxide photocatalysis
Source: PubMed Central journal article supplement — RSC Adv. 2018 Jul 20;8(46):26124–32. doi: 10.1039/c8ra05020a (PMC9082927; doi:10.1039/c8ra05020a), 2018-07-20

**Inactivation of an urban wastewater indigenous *Escherichia coli* strain by cerium doped  
zinc oxide photocatalysis**

SUPPLEMENTARY MATERIAL

Osaka 125 W UVA lamp spectrum

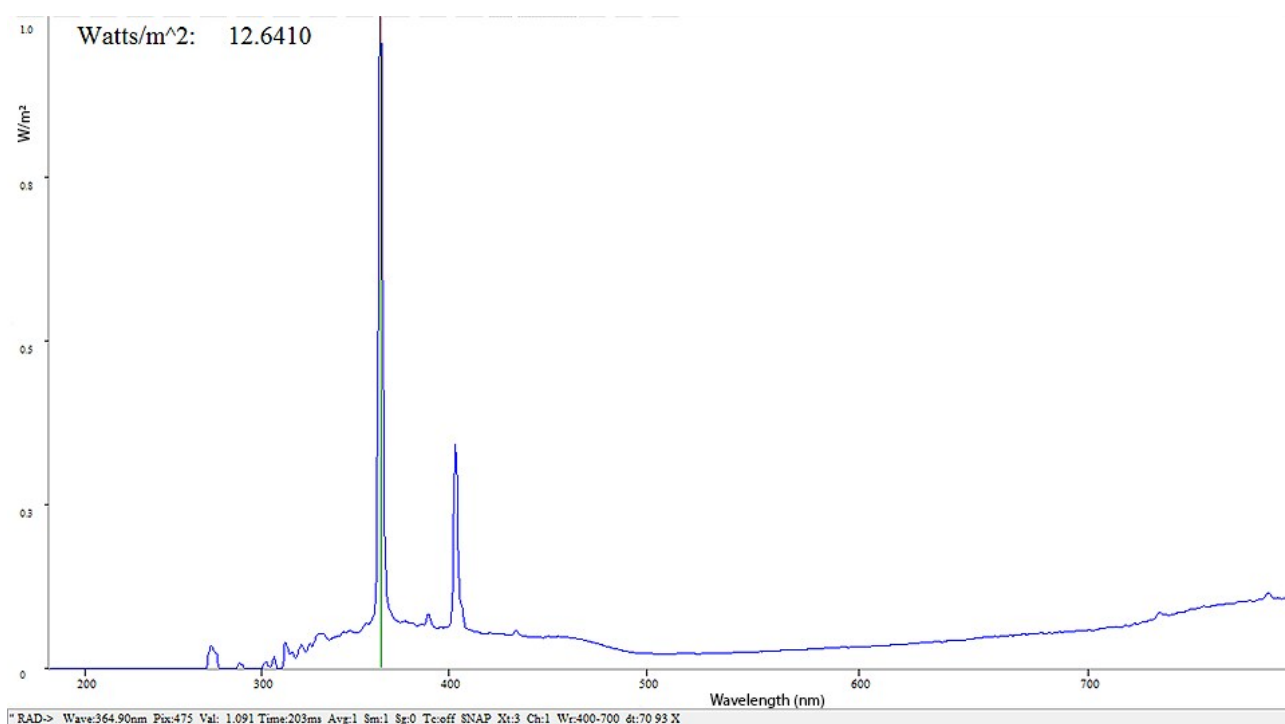

Supplement: RA-008-C8RA05020A-s001.pdf [file RA-008-C8RA05020A-s001.pdf]
